# Supplementary material
Source: publisher figshare collection journal article supplement (https://acs.figshare.com/ndownloader/files/14118866)
Supplement: Supplementary file 1 [file 14118866]

# **Biomimetic polyimide-supported cuprous oxide photocatalytic film with tunable hydrophobicity, improved thermal stability and photocatalytic activity toward CO<sub>2</sub> reduction**

I-Hsiang Tseng\*<sup>1</sup>, Li-Huan Kang<sup>1</sup>, Po-Ya Chang<sup>1</sup>, Mei-Hui Tsai<sup>2</sup>, Jui-Ming Yeh<sup>3</sup>, Ta-I Yang<sup>4</sup>

<sup>1</sup>Dept. of Chemical Engineering, Feng Chia University, Taichung 40724, Taiwan

<sup>2</sup>Dept. of Chemical and Materials Engineering, National Chin-Yi University of Technology,  
Taichung, 41170, Taiwan

<sup>3</sup>Dept. of Chemistry, Chung-Yuan Christian University, Chungli 32023, Taiwan

<sup>4</sup>Dept. of Chemical Engineering, Chung-Yuan Christian University, Chungli 32023, Taiwan

(a)

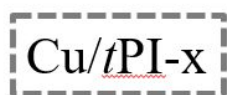

x: ion-exchange time (5, 10, 30 min)

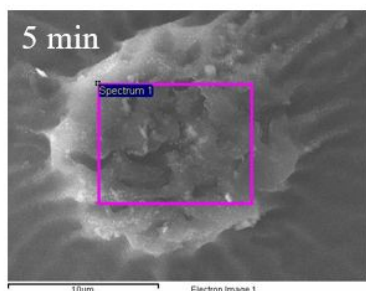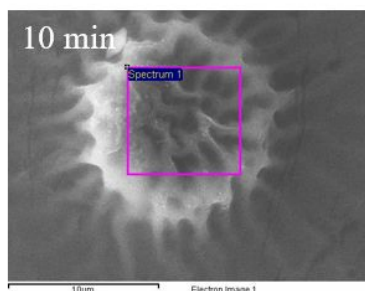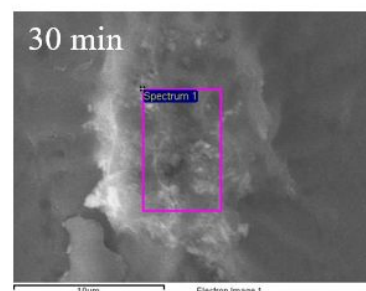

| Element | Atomic %          |                    |                    |
|---------|-------------------|--------------------|--------------------|
|         | Cu/ <i>t</i> PI-5 | Cu/ <i>t</i> PI-10 | Cu/ <i>t</i> PI-30 |
| C       | 78.44             | 76.38              | 73.97              |
| O       | 20.96             | 22.28              | 24.01              |
| Cu      | 0.60              | 1.34               | 2.02               |

(b)

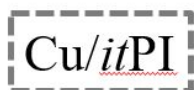

x: ion-exchange time (5, 10, 30 min)

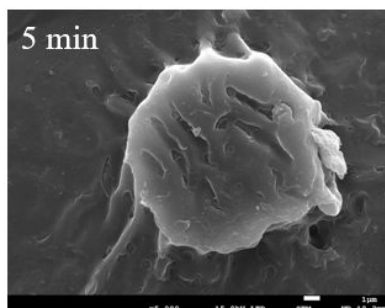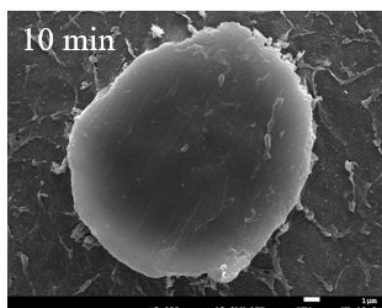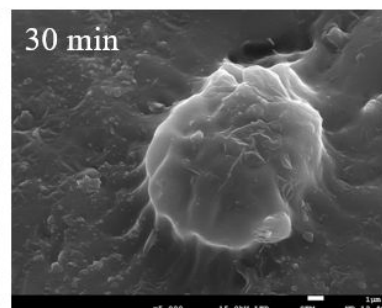

| Element | Atomic %           |                     |                     |
|---------|--------------------|---------------------|---------------------|
|         | Cu/ <i>it</i> PI-5 | Cu/ <i>it</i> PI-10 | Cu/ <i>it</i> PI-30 |
| C       | 75.51              | 75.78               | 73.60               |
| O       | 24.39              | 24.14               | 26.31               |
| Cu      | 0.10               | 0.08                | 0.09                |

**Figure S1.** Top-view SEM images and EDX elemental ratios of (a) Cu/*t*PI-x and (b) Cu/*it*PI-x films.
